# Supplementary material for: Dental pulp stem cells ameliorate D-galactose-induced cardiac ageing in rats
Source: PeerJ journal article supplement (doi:10.7717/peerj.17299), 2024-05-21
Supplement: Full-length_uncropped.pdf [file Full-length_uncropped.pdf]

# BAX

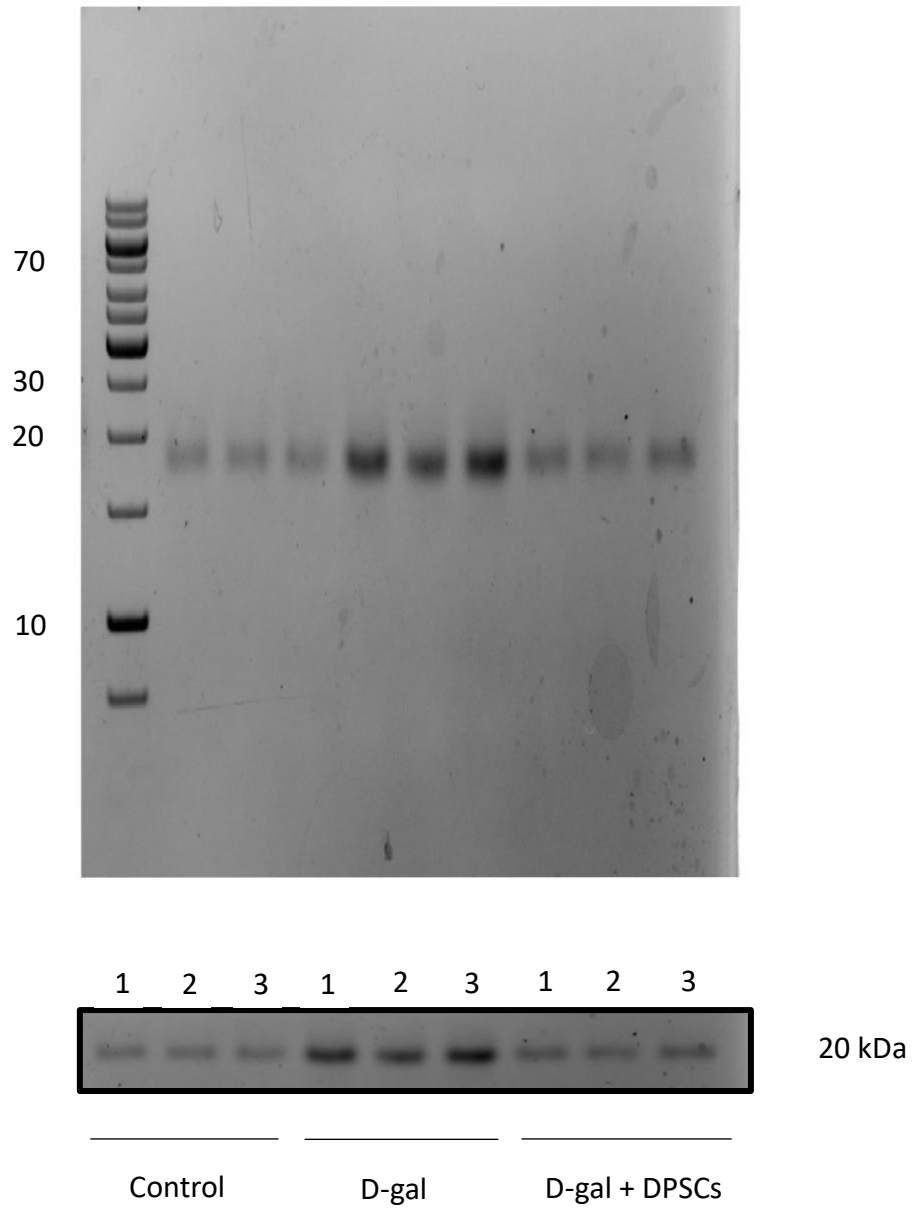

Each lane represents a biological replicate.

# BCL2

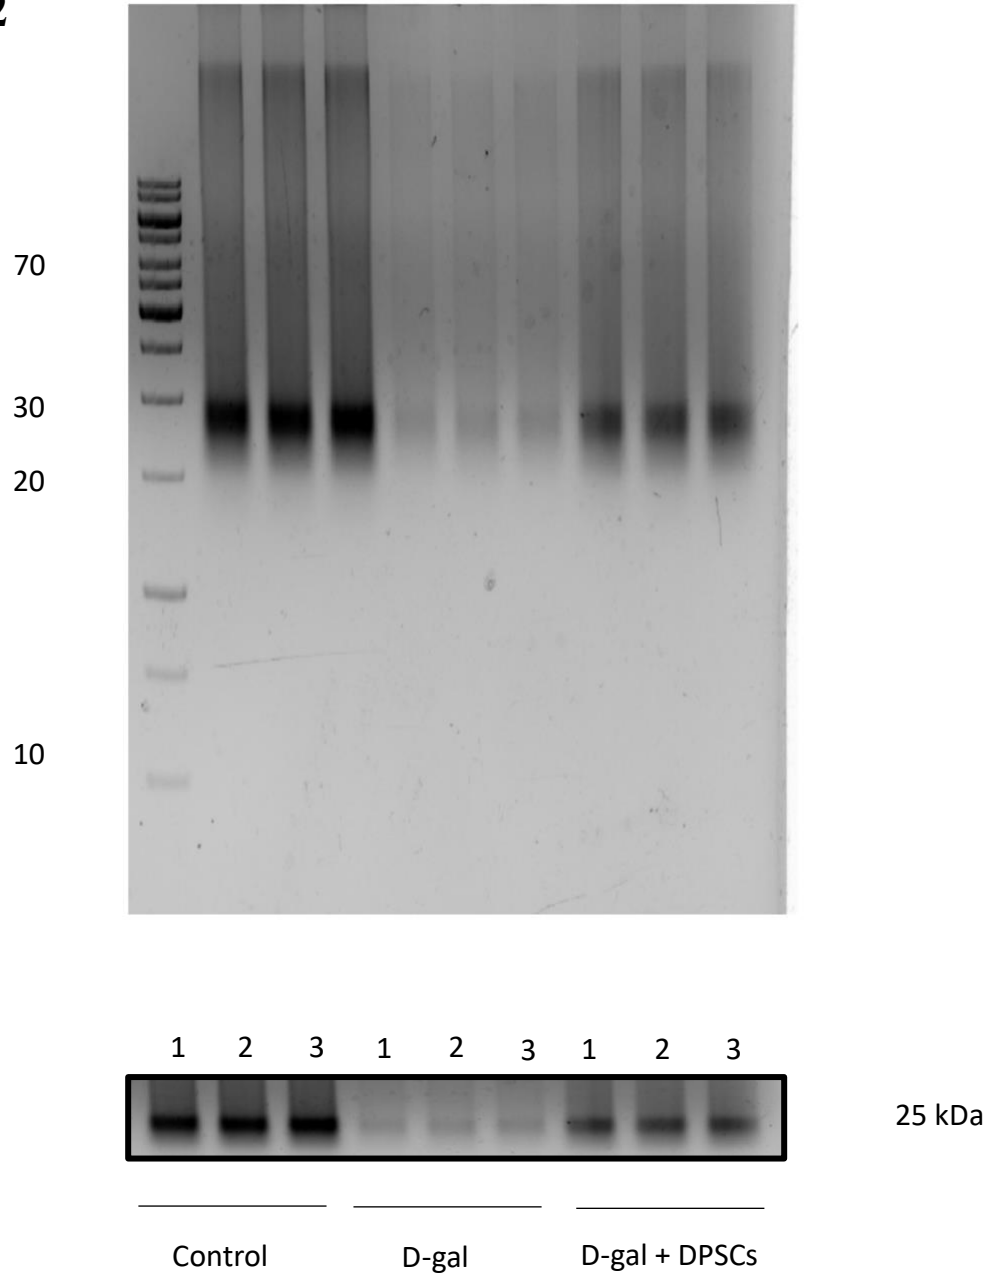

Each lane represents a biological replicate.

# Caspase-3

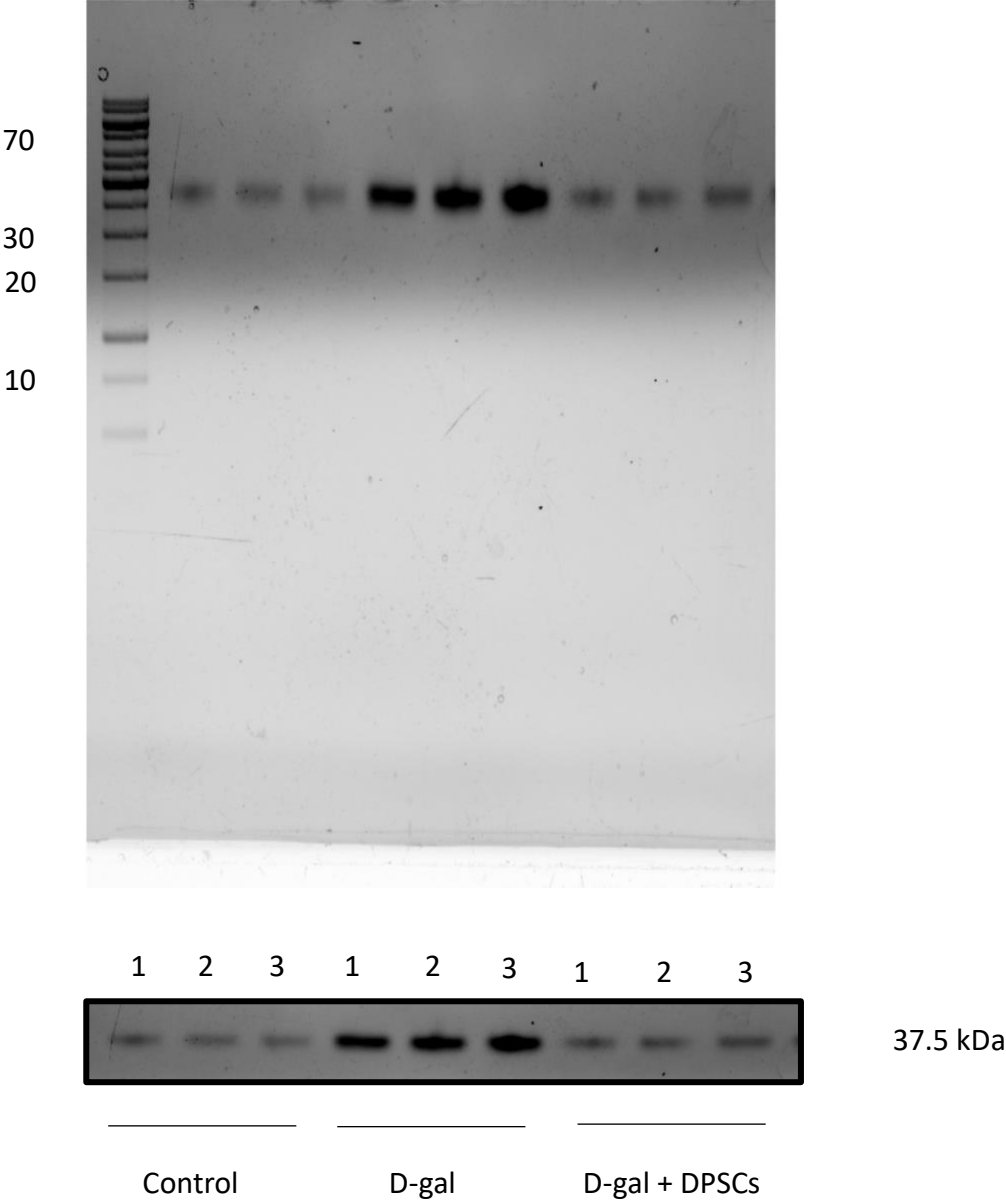

Each lane represents a biological replicate.

# Cytochrome-c

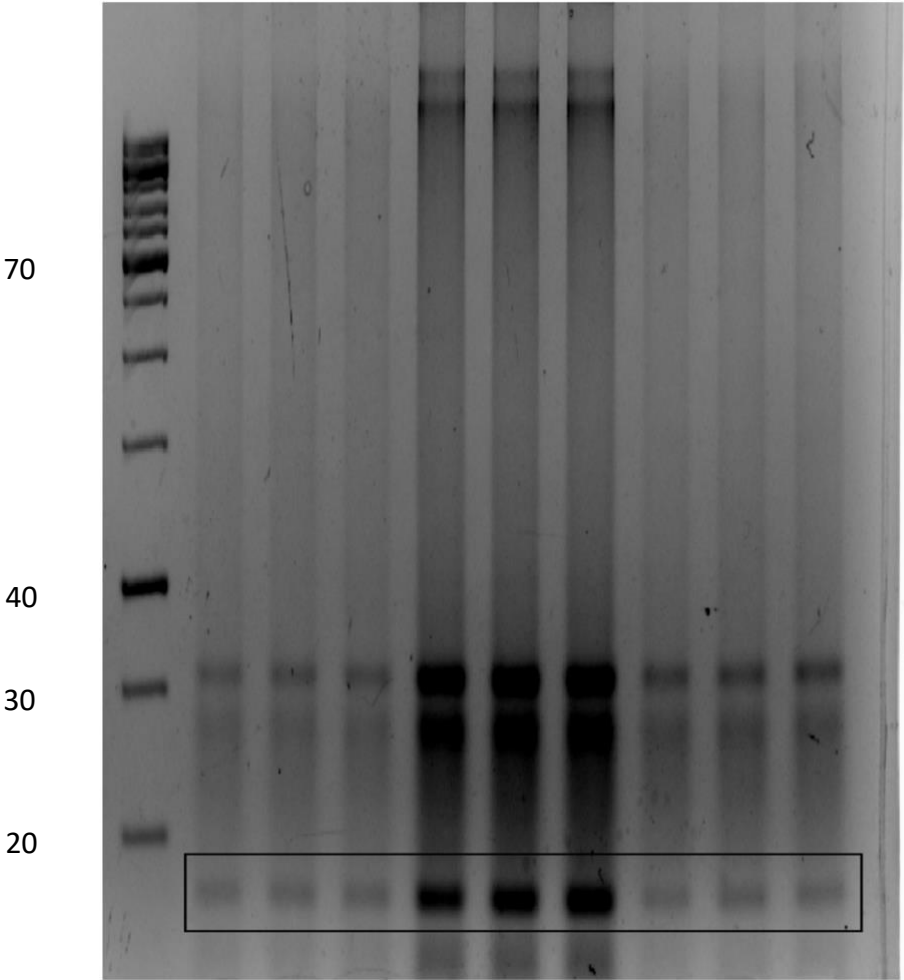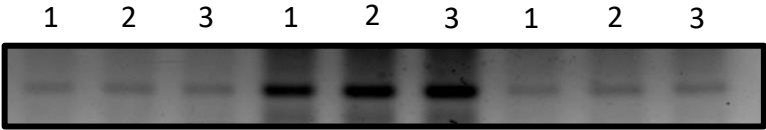

12 kDa

Control

D-gal

D-gal + DPSCs

Each lane represents a biological replicate.

# SIRT 1

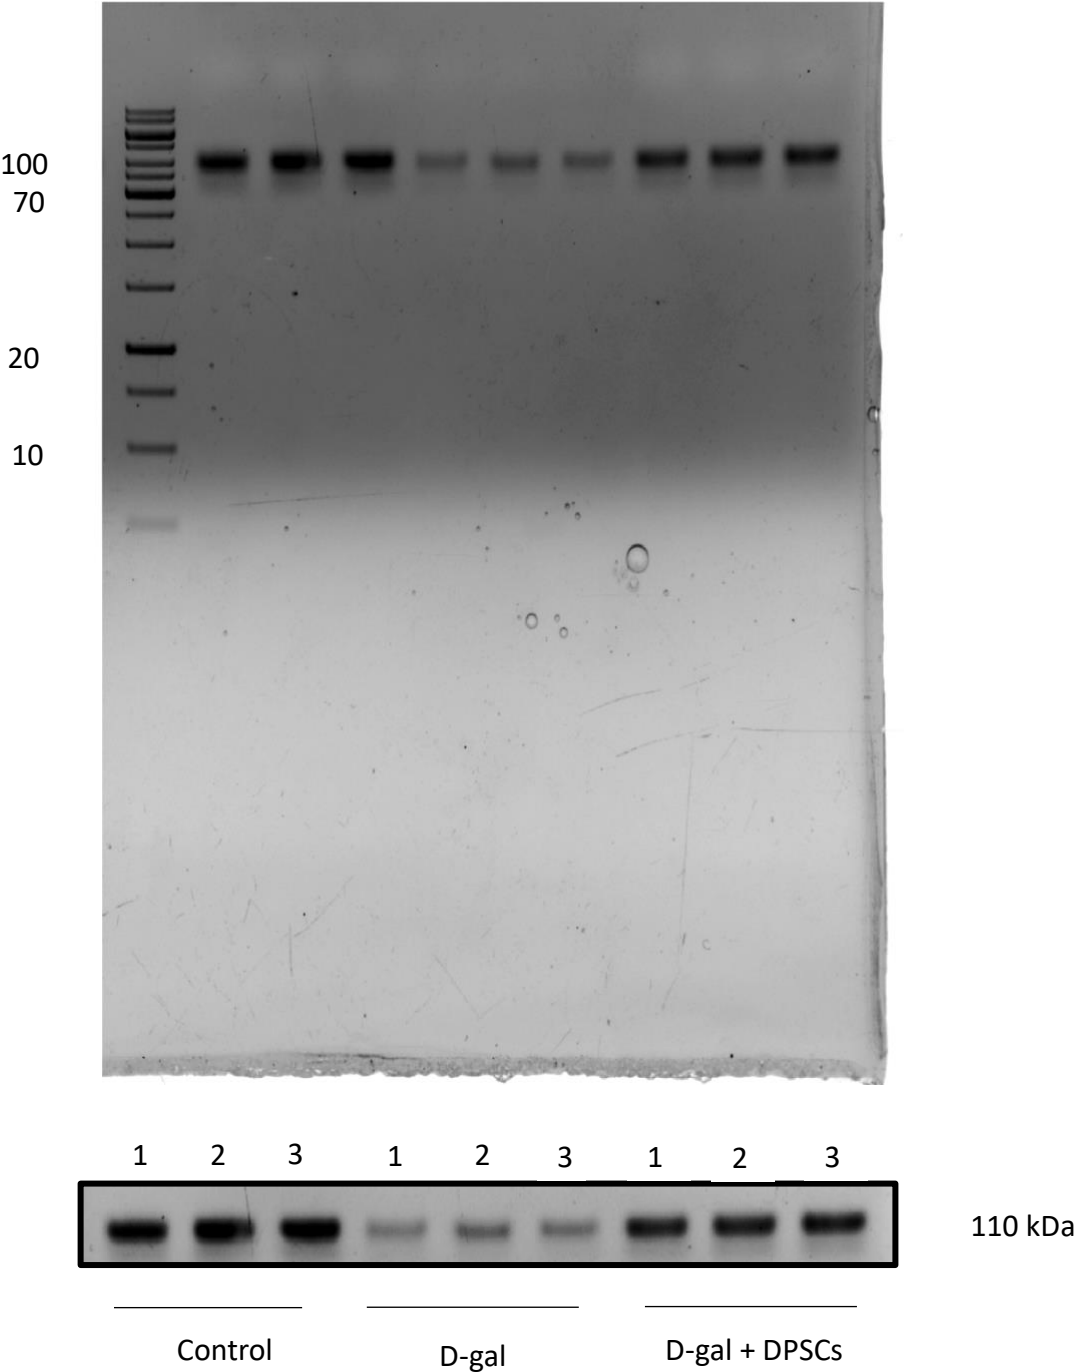

Each lane represents a biological replicate.

# B Actin

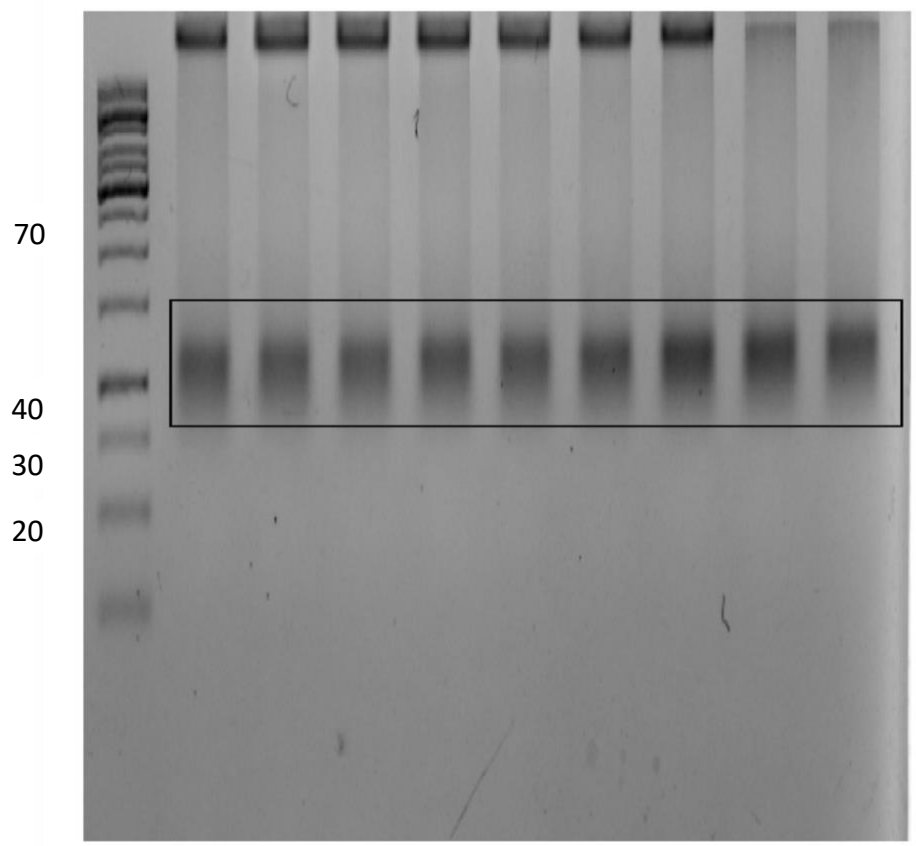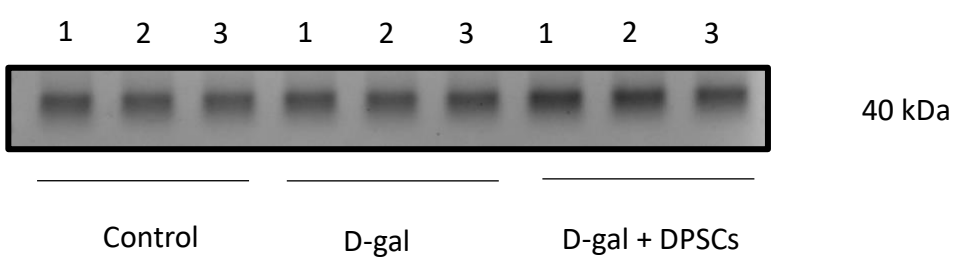

Each lane represents a biological replicate.
