# Supplementary material for: Dental pulp stem cells ameliorate D-galactose-induced cardiac ageing in rats
Source: PeerJ. 2024 May 21;12:e17299. doi: 10.7717/peerj.17299 (PMC11127642; doi:10.7717/peerj.17299)
Supplement: Supplemental Information 2 [file peerj-12-17299-s002.xlsx]

## Sheet: Figure 2 
F
	EF%	FS%	LVPWD	LVIDs	ESV	LVIDd	EDV
CONTROL	62.45	33.69	1.48	4.25	0.22	6.4	4.8
CONTROL	59.44	28.19	1.53	4.45	0.25	6.56	4.63
CONTROL	58.6	34.7	1.58	4.65	0.27	6.99	4.72
CONTROL	54.92	26.65	1.39	3.87	0.17	5	4.38
CONTROL	59.22	30.2	1.31	3.61	0.17	4.78	4.23
CONTROL	59.01	27.49	1.22	3.3	0.09	4.2	4.06
AGED	48	25.7	3	5.68	0.405	6.49	5.6
AGED	49.45	20.2	2.6	5.98	0.425	6.58	5.5
AGED	45.95	22.7	2.7	6.28	0.445	6.67	5.8
AGED	46.82	26.4	1.9	5.13	0.37	6.33	4.65
AGED	42.75	20.15	1.8	4.68	0.335	6.18	4.4
AGED	45.66	18.7	1.4	4.14	0.325	6.01	4
TREATED	62.12	28.75	1.7	4.65	0.28	6.56	5.2
TREATED	58.62	25.45	1.8	5.15	0.31	6.64	4.56
TREATED	53.12	30.95	1.9	4.8	0.34	5.9	4.5
TREATED	46.62	23.95	1.4	3	0.255	5.8	4.08
TREATED	46.12	29.45	1.15	3	0.18	5.8	4.3
TREATED	55.62	24.95	1.42	3.5	0.13	5.7	4

## Sheet: Figure 3
Connexin 43
Control	D gal	D gal+DPSCs
170	70	130
160	65	135
159	60	125
156	67	140
150	50	120

## Sheet: Figure 4 
Cardiomyocytes area					MT staining area
Control	D gal	D gal+DPSCs			Control	D gal	D gal+DPSCs
150	300	250			2	25	25
170	350	300			4	20	19
156	340	302			3	35	12
200	400	150			2	20	17
160	390	180			5	36	11
