# Supplementary material for: Dental pulp stem cells ameliorate D-galactose-induced cardiac ageing in rats
Source: PeerJ. 2024 May 21;12:e17299. doi: 10.7717/peerj.17299 (PMC11127642; doi:10.7717/peerj.17299)
Supplement: Supplemental Information 3 [file peerj-12-17299-s003.xlsx]

## Sheet: Sheet1
	ELISA				PCR					W.B
	MDA	GSH	SOD		P21	P53	GALACTOSIDASE			BAX	BCL2	CYTOCHROME C	SIRT	Casepase-3
CONTROL	24.1	92.1	67.1		1.03	1	1.01			1.02	1	1	1.02	1.01
CONTROL	39.5	102.4	81.5		1	1.02	1.04			1.03	1.08	1.04	1.01	1
CONTROL	32.6	115.7	64.3		1.01	1	1.02			1.01	1	1.03	1.04	1.01
CONTROL	37.5	98.3	69.2		1.03	1.01	1.01			1	1.03	1.07	1	1.02
CONTROL	30.7	96.2	53.6		1.02	1.04	1.02			1.02	1	1.02	1.06	1.03
CONTROL	32.9	104.6	67.1		1	1.02	1.01			1.04	1.02	1.04	1.02	1.02
AGED	123.4	36.4	21.4		5.2	3.8	5.1			6.5	0.13	7.9	0.21	4.7
AGED	143.6	52.6	25.8		5.9	6.2	4.9			6.3	0.16	8.2	0.19	6.2
AGED	118.2	31.5	20.7		10.1	6.9	4.6			5.8	0.34	7.6	0.14	4.3
AGED	125.6	34.8	32.5		5.3	8.5	8.7			6.7	0.32	8.5	0.41	6.04
AGED	113.6	53.2	23.4		7.6	6.7	8.9			7.2	0.18	8.3	0.25	6.5
AGED	119.4	29.8	25.6		10.8	8.2	5.3			6.9	0.35	5.7	0.44	6.9
TREATED	52.6	86.5	45.1		5.01	2.6	3.2			2.8	0.85	3.8	0.67	3.02
TREATED	38.4	88.1	62.4		3.5	3.9	3.6			2.6	0.94	3.9	0.69	3.1
TREATED	37.5	83.4	48.2		3.1	2.3	4.01			2.3	0.63	4.2	0.74	3.6
TREATED	59.3	98.6	44.6		5.02	2.1	1.8			3.1	0.68	3.4	0.91	3.9
TREATED	81.4	105.3	60.1		1.7	3.5	1.2			3.7	0.92	1.9	0.78	2.5
TREATED	35.8	86.4	65.4		3.4	2.08	1.3			2.5	0.86	3.2	0.72	2.7
	NMOL/GM TISSUE	U/GM TISSUE	U/GM TISSUE		RELATIVE EXPRESSION					RELATIVE EXPRESSION
